# Supplementary material for: ASR Enhances Environmental Stress Tolerance and Improves Grain Yield by Modulating Stomatal Closure in Rice
Source: PubMed Central journal article supplement (PMC7033646; doi:10.3389/fpls.2019.01752), 2020-02-14
Supplement: DataSheet_1.pdf [file DataSheet_1.pdf]

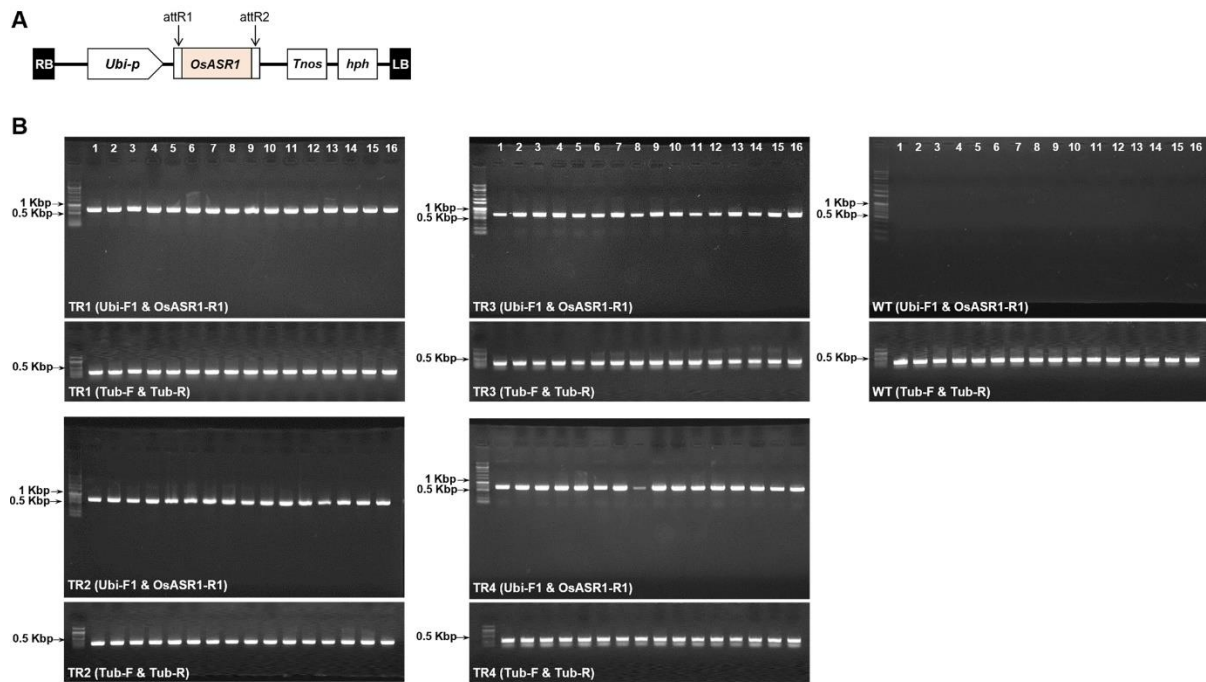

**Supplementary Figure S1.** Production of *OsASR1*-overexpressing transgenic rice plants. **(A)** Schematic representation of the genomic structure of the *OsASR1* gene including a maize ubiquitin promoter (*Ubi-p*), the *OsASR1* coding regions, and the nos terminator (*Tnos*), which was derived from the nopaline synthase gene. The antibiotic resistance gene, hygromycin (*hgh*), was used as a selection marker. LB, left border; RB, right border; attR1 and attR2, the gateway recombination sites in the *pGA2897* binary vector. **(B)** PCR confirmation of *OsASR1* expression in four independent transgenic plants (TR1, TR2, TR3, and TR4) using primer sets (Ubi-F1, OsASR1-R1, Tub-F, and Tub-R).

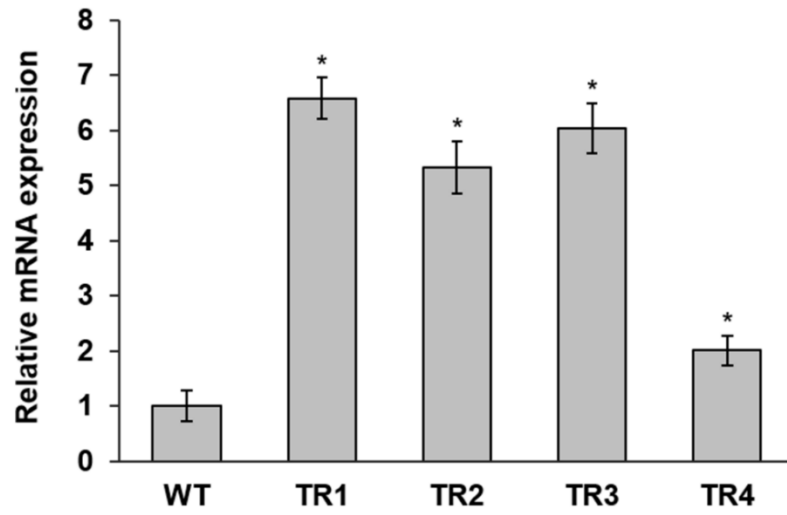

**Supplementary Figure S2.** Relative expression levels of *OsASR1* in four-week-old *OsASR1*-overexpressing transgenic and WT rice plants.

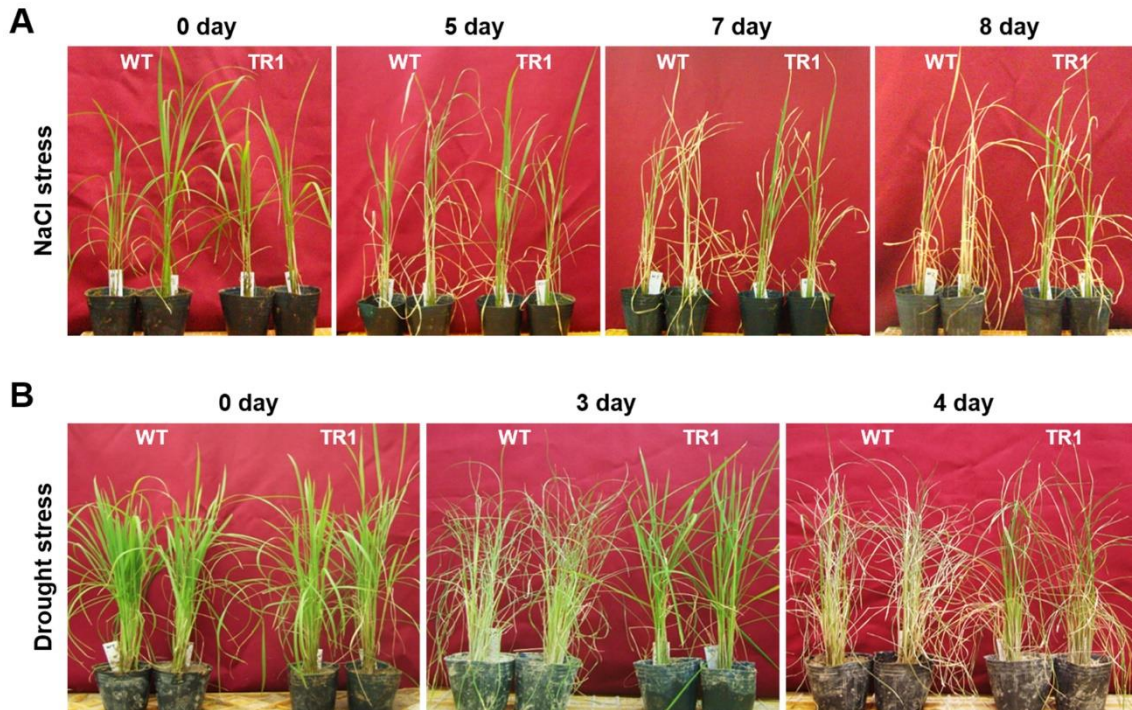

**Supplementary Figure S3.** Analysis of salt and drought tolerance in *OsASR1*-overexpressing transgenic plants. **(A)** Four-week-old seedlings ( $n=15$ ) after treatment with 200 mM NaCl for 5, 7, and 8 d. **(B)** Four-week-old seedlings ( $n=30$ ) after exposure to non-watered conditions for 3 and 4 d.

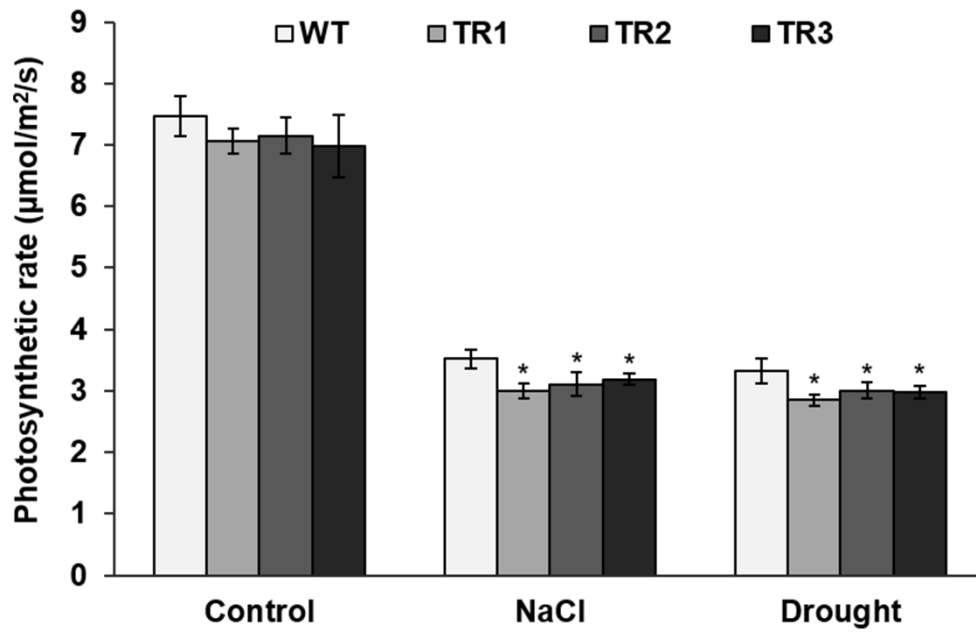

**Supplementary Figure S4.** Net photosynthetic rate in leaves of WT and transgenic rice plants subjected to salt and drought stress for 5 and 2 d, respectively.

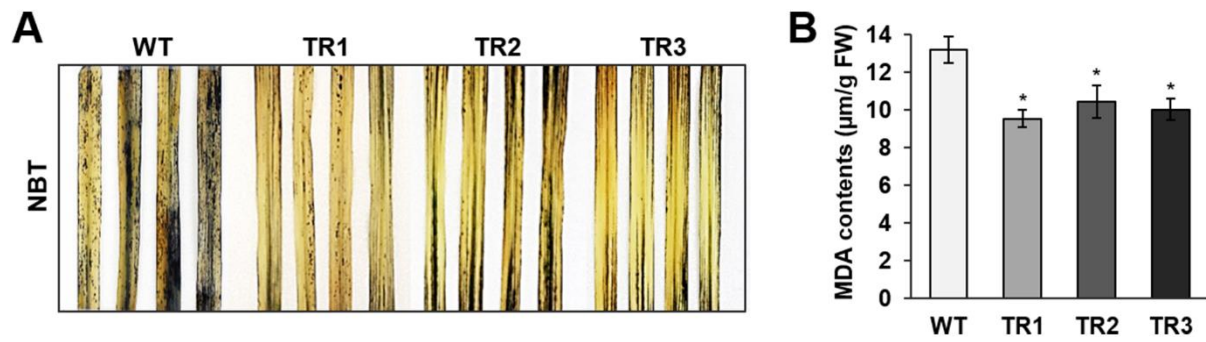

**Supplementary Figure S5.** Analysis of superoxide ion ( $O_2^-$ ) and malondialdehyde (MDA) contents in *OsASRI*-overexpressing transgenic plants. **(A)** Phenotype of nitro blue tetrazolium (NBT) staining and **(B)** MDA contents in transgenic and WT plants 7 weeks after transplanting in the paddy fields. Asterisks indicate significant differences between treatments determined by Student's *t*-test ( $P < 0.05$ ).

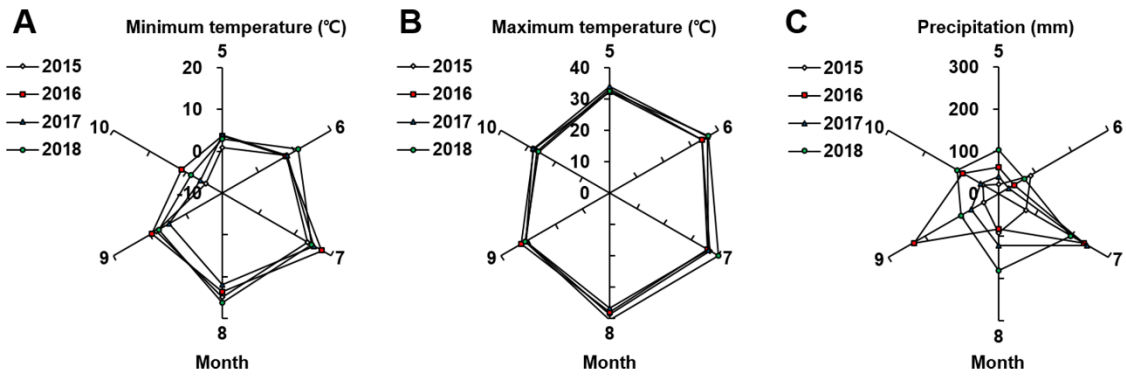

**Supplementary Figure S6.** Weather conditions during the cultivation periods (May–October) from 2015 to 2018 in the paddy field experiments. **(A)** Average minimum temperature for 6 months. **(B)** Average maximum temperature for 6 months. **(C)** Average monthly precipitation for 6 months.

**Supplementary Table S1.** Location of gene insertion and copy number through flanking sequence analysis.

| Line | Chromosome | Chr_start | Chr_end  | Type                | Gene ID                             | Description                                     |
|------|------------|-----------|----------|---------------------|-------------------------------------|-------------------------------------------------|
| TR1  | chr12      | 1167426   | 1167554  | Intergenic          | Os12t0124100-01<br>upstream 2.135kb | Conserved<br>hypothetical<br>protein.           |
| TR2  | chr02      | 8490179   | 8490353  | 5'Upstream-<br>1000 | Os02t0250300-01<br>upstream 0.213kb | Bromodomain<br>containing<br>protein.           |
| TR3  | chr12      | 17655452  | 17655685 | Intergenic          | Os12t0480300-01<br>upstream 4.197kb | Hypothetical<br>gene.                           |
|      | chr02      | 6677022   | 6676822  | 5'Upstream-<br>1000 | Os02t0219800-01<br>upstream 0.096kb | Tetraspanin<br>domain<br>containing<br>protein. |

**Supplementary Table S2.** Primer sequences used in this study.

| Oligo name | Oligonucleotide sequences (5'-3') |
|------------|-----------------------------------|
| OsASR1-FC  | CACCTAACTCTGTCTGAAGGAAGCTAAGA     |
| OsASR1-RC  | AATTATGGGGAGAAAGTAATTAAGCA        |
| Ubi-F1     | CATCTTCATAGTTACGAGTTTAAGATGGAT    |
| OsASR1-F1  | AGCACCACCACCTGTTCCAC              |
| OsASR1-R1  | ACTAGATCGATCCCGATCGAATGA          |
| Tub-F      | GAGTACCCTGCCGCATGAT               |
| Tub-R      | GTGGTCAGCTTGAGAGTCCT              |
| OsZEP1-F   | TCTGGGACCATTGTCGTTTTT             |
| OsZEP1-R   | GCTCAACATCAAAGGCATTCC             |
| OsNCED4-F  | GATTGCACGGCACCTTCATT              |
| OsNCED4-R  | CTCTGTAATTTGATTTTTCACTGGCTAAT     |
| OsNCED5-F  | GGATGGGCTGAACTTCTTCCAG            |
| OsNCED5-R  | CAGCACATTCGTGATGAACCCT            |
| OsRab21-F  | CACACCACAGCAAGAGCTAAGTG           |
| OsRab21-R  | TGGTGCTCCATCCTGCTTAAG             |
| OsRab16C-F | TTCCCGGCCAGCACTAAAT               |
| OsRab16C-R | AAACTGCACGTACATCACGACAT           |
| OsRab16D-F | CGGGTAAACAATAAAGTCGTGATG          |
| OsRab16D-R | GCGCACTTACATACAGTGCTACGT          |
| OsMOC1-F   | CCATTGCTGGCCTTATGTGA              |
| OsMOC1-R   | CCCCATCATTACCCACCAAA              |
| OsDLT-F    | ACGCGGTCGAGGAGTATGG               |
| OsDLT-R    | ATCGTCCCTGCAATGGATTG              |
| OsMPH1-F   | CATCCTGTCAGCCTCCAGAAG             |
| OsMPH1-R   | CCCCTGACGCGTAAATGC                |
| OsPROG1-F  | TGAGTTCGGCAAGCAAACG               |
| OsPROG1-R  | ATCCTTCCCTCCATTACTTCTTC           |
